# Supplementary material
Source: MDPI journal article supplement (https://www.mdpi.com/2073-4395/11/2/311)
Supplement: s1 [file s1]

**Table S1.** Objectives, decision variables modified, constraints applied, and exploration parameters used during the generation of alternative banana-bush bean management configurations for field experiments in eastern DR Congo.

| Scenario                        |                                                                       | Original | Min  | Max  |
|---------------------------------|-----------------------------------------------------------------------|----------|------|------|
| <b>All input scenarios</b>      | <b>Exploration Parameters</b>                                         |          |      |      |
|                                 | Amplitude (F)                                                         | 0.15     |      |      |
|                                 | Probability (C <sub>R</sub> )                                         | 0.85     |      |      |
|                                 | Number of solutions                                                   | 1000     |      |      |
|                                 | Number of iterations                                                  | 2000     |      |      |
| <b>Business as usual (BaU)</b>  | <b>Objectives</b>                                                     |          |      |      |
|                                 | Operating profit (US\$ ha <sup>-1</sup> year <sup>-1</sup> )          | 2575     |      | ✓    |
|                                 | Nitrogen input (kg ha <sup>-1</sup> year <sup>-1</sup> )              | 188      | ✓    |      |
|                                 | Soil organic matter balance (kg ha <sup>-1</sup> year <sup>-1</sup> ) | 14962    |      | ✓    |
|                                 | Protein yield (persons ha <sup>-1</sup> year <sup>-1</sup> )          | 23       |      | ✓    |
|                                 | <b>Decision Variables</b>                                             |          |      |      |
|                                 | Bush bean monocrop area (ha)                                          | 0        | 0    | 1    |
|                                 | Banana monocrop with 4 leaves area (ha)                               | 0        | 0    | 1    |
|                                 | Banana monocrop with 7 leaves area (ha)                               | 0        | 0    | 1    |
|                                 | Banana monocrop with all leaves (un-pruned) area (ha)                 | 0        | 0    | 1    |
|                                 | Banana-bush bean intercrop with 4 leaves area (ha)                    | 1        | 0    | 1    |
|                                 | Banana-bush bean intercrop with 7 leaves area (ha)                    | 0        | 0    | 1    |
|                                 | Banana-bush bean intercrop with all leaves area (ha)                  | 0        | 0    | 1    |
|                                 | Subsequent goat manure added (kg)                                     | 0        | 0    | 8000 |
|                                 | <b>Constraints</b>                                                    |          |      |      |
|                                 | Total farm area (ha)                                                  | 1        | 0.95 | 1    |
|                                 | N balance (kg ha <sup>-1</sup> year <sup>-1</sup> )                   | 94       | 0    | 9999 |
|                                 | P balance (kg ha <sup>-1</sup> year <sup>-1</sup> )                   | 107      | 0    | 9999 |
|                                 | K balance (kg ha <sup>-1</sup> year <sup>-1</sup> )                   | -131     | -135 | 9999 |
| <b>Hedges (H)</b>               | <b>Objectives</b>                                                     |          |      |      |
|                                 | Operating profit (US\$ ha <sup>-1</sup> year <sup>-1</sup> )          | 2575     |      | ✓    |
|                                 | Nitrogen input (kg ha <sup>-1</sup> year <sup>-1</sup> )              | 188      | ✓    |      |
|                                 | Soil organic matter balance (kg ha <sup>-1</sup> year <sup>-1</sup> ) | 14962    |      | ✓    |
|                                 | Protein yield (persons ha <sup>-1</sup> year <sup>-1</sup> )          | 23       |      | ✓    |
|                                 | <b>Decision variables</b>                                             |          |      |      |
|                                 | Bush bean monocrop area (ha)                                          | 0        | 0    | 1    |
|                                 | Banana monocrop with 4 leaves area (ha)                               | 0        | 0    | 1    |
|                                 | Banana monocrop with 7 leaves area (ha)                               | 0        | 0    | 1    |
|                                 | Banana monocrop with all leaves (un-pruned) area (ha)                 | 0        | 0    | 1    |
|                                 | Banana-bush bean intercrop with 4 leaves area (ha)                    | 1        | 0    | 1    |
|                                 | Banana-bush bean intercrop with 7 leaves area (ha)                    | 0        | 0    | 1    |
|                                 | Banana-bush bean intercrop with all leaves area (ha)                  | 0        | 0    | 1    |
|                                 | Calliandra hedge area (ha)                                            | 0        | 0    | 0.1  |
|                                 | Tithonia hedge area (ha)                                              | 0        | 0    | 0.1  |
|                                 | <b>Constraints</b>                                                    |          |      |      |
|                                 | Total farm area (ha)                                                  | 1        | 0.95 | 1    |
|                                 | N balance (kg ha <sup>-1</sup> year <sup>-1</sup> )                   | 94       | 0    | 9999 |
|                                 | P balance (kg ha <sup>-1</sup> year <sup>-1</sup> )                   | 107      | 0    | 9999 |
|                                 | K balance (kg ha <sup>-1</sup> year <sup>-1</sup> )                   | -131     | -135 | 9999 |
| <b>Inorganic fertilizer (I)</b> | <b>Objectives</b>                                                     |          |      |      |
|                                 | Operating profit (US\$ ha <sup>-1</sup> year <sup>-1</sup> )          | 1403     |      | ✓    |

| Scenario                   |                                                                       | Original | Min  | Max  |
|----------------------------|-----------------------------------------------------------------------|----------|------|------|
|                            | Nitrogen input (kg ha <sup>-1</sup> year <sup>-1</sup> )              | 500      | ✓    |      |
|                            | Soil organic matter balance (kg ha <sup>-1</sup> year <sup>-1</sup> ) | 14962    |      | ✓    |
|                            | Protein yield (persons ha <sup>-1</sup> year <sup>-1</sup> )          | 23       |      | ✓    |
|                            | <b>Decision variables</b>                                             |          |      |      |
|                            | Bush bean monocrop area (ha)                                          | 0        | 0    | 1    |
|                            | Banana monocrop with 4 leaves area (ha)                               | 0        | 0    | 1    |
|                            | Banana monocrop with 7 leaves area (ha)                               | 0        | 0    | 1    |
|                            | Banana monocrop with all leaves (un-pruned) area (ha)                 | 0        | 0    | 1    |
|                            | Banana-bush bean intercrop with 4 leaves area (ha)                    | 1        | 0    | 1    |
|                            | Banana-bush bean intercrop with 7 leaves area (ha)                    | 0        | 0    | 1    |
|                            | Banana-bush bean intercrop with all leaves area (ha)                  | 0        | 0    | 1    |
|                            | NPK (17:17:17) (kg)                                                   | 588      | 0    | 700  |
|                            | CAN (26% N) (kg)                                                      | 385      | 0    | 400  |
|                            | DAP (kg)                                                              | 65       | 0    | 70   |
|                            | MOP (kg)                                                              | 407      | 0    | 500  |
|                            | Urea (kg)                                                             | 217      | 0    | 300  |
| <b>H+I</b>                 | <b>Constraints</b>                                                    |          |      |      |
|                            | Total farm area (ha)                                                  | 1        | 0.95 | 1    |
|                            | N balance (kg ha <sup>-1</sup> year <sup>-1</sup> )                   | 406      | 0    | 9999 |
|                            | P balance (kg ha <sup>-1</sup> year <sup>-1</sup> )                   | 237      | 0    | 9999 |
|                            | K balance (kg ha <sup>-1</sup> year <sup>-1</sup> )                   | 217      | 0    | 9999 |
|                            | <b>Objectives</b>                                                     |          |      |      |
|                            | Operating profit (US\$ ha <sup>-1</sup> year <sup>-1</sup> )          | 1403     |      | ✓    |
|                            | Nitrogen input (kg ha <sup>-1</sup> year <sup>-1</sup> )              | 500      | ✓    |      |
|                            | Soil organic matter balance (kg ha <sup>-1</sup> year <sup>-1</sup> ) | 14962    |      | ✓    |
|                            | Protein yield (persons ha <sup>-1</sup> year <sup>-1</sup> )          | 23       |      | ✓    |
|                            | <b>Decision Variables</b>                                             |          |      |      |
|                            | Bush bean monocrop area (ha)                                          | 0        | 0    | 1    |
|                            | Banana monocrop with 4 leaves area (ha)                               | 0        | 0    | 1    |
|                            | Banana monocrop with 7 leaves area (ha)                               | 0        | 0    | 1    |
|                            | Banana monocrop with all leaves (un-pruned) area (ha)                 | 0        | 0    | 1    |
|                            | Banana-bush bean intercrop with 4 leaves area (ha)                    | 1        | 0    | 1    |
|                            | Banana-bush bean intercrop with 7 leaves area (ha)                    | 0        | 0    | 1    |
|                            | Banana-bush bean intercrop with all leaves area (ha)                  | 0        | 0    | 1    |
|                            | Calliandra hedge area (ha)                                            | 0        | 0    | 0.1  |
|                            | Tithonia hedge area (ha)                                              | 0        | 0    | 0.1  |
|                            | NPK (17:17:17) (kg)                                                   | 588      | 0    | 700  |
|                            | CAN (26% N) (kg)                                                      | 385      | 0    | 400  |
|                            | DAP (kg)                                                              | 65       | 0    | 70   |
|                            | MOP (kg)                                                              | 407      | 0    | 500  |
|                            | Urea (kg)                                                             | 217      | 0    | 300  |
|                            | <b>Constraints</b>                                                    |          |      |      |
|                            | Total farm area (ha)                                                  | 1        | 0.95 | 1    |
|                            | N balance (kg ha <sup>-1</sup> year <sup>-1</sup> )                   | 406      | 0    | 9999 |
|                            | P balance (kg ha <sup>-1</sup> year <sup>-1</sup> )                   | 237      | 0    | 9999 |
|                            | K balance (kg ha <sup>-1</sup> year <sup>-1</sup> )                   | 217      | 0    | 9999 |
| <b>H + Goat manure (M)</b> | <b>Objectives</b>                                                     |          |      |      |
|                            | Operating profit (US\$ ha <sup>-1</sup> year <sup>-1</sup> )          | 1321     |      | ✓    |
|                            | Nitrogen input (kg ha <sup>-1</sup> year <sup>-1</sup> )              | 550      | ✓    |      |

| Scenario                                                              | Original | Min  | Max  |
|-----------------------------------------------------------------------|----------|------|------|
| Soil organic matter balance (kg ha <sup>-1</sup> year <sup>-1</sup> ) | 18050    |      | ✓    |
| Protein yield (persons ha <sup>-1</sup> year <sup>-1</sup> )          | 23       |      | ✓    |
| <b>Decision Variables</b>                                             |          |      |      |
| Bush bean monocrop area (ha)                                          | 0        | 0    | 1    |
| Banana monocrop with 4 leaves area (ha)                               | 0        | 0    | 1    |
| Banana monocrop with 7 leaves area (ha)                               | 0        | 0    | 1    |
| Banana monocrop with all leaves (un-pruned) area (ha)                 | 0        | 0    | 1    |
| Banana-bush bean intercrop with 4 leaves area (ha)                    | 1        | 0    | 1    |
| Banana-bush bean intercrop with 7 leaves area (ha)                    | 0        | 0    | 1    |
| Banana-bush bean intercrop with all leaves area (ha)                  | 0        | 0    | 1    |
| Calliandra hedge area (ha)                                            | 0        | 0    | 0.1  |
| Tithonia hedge area (ha)                                              | 0        | 0    | 0.1  |
| Subsequent goat manure added (kg)                                     | 7352     | 0    | 8000 |
| <b>Constraints</b>                                                    |          |      |      |
| Total farm area (ha)                                                  | 1        | 0.95 | 1    |
| N balance (kg ha <sup>-1</sup> year <sup>-1</sup> )                   | 456      | 0    | 9999 |
| P balance (kg ha <sup>-1</sup> year <sup>-1</sup> )                   | 240      | 0    | 9999 |
| K balance (kg ha <sup>-1</sup> year <sup>-1</sup> )                   | 220      | 0    | 9999 |
| <b>H+I+M Objectives</b>                                               |          |      |      |
| Operating profit (US\$ ha <sup>-1</sup> year <sup>-1</sup> )          | 1321     |      | ✓    |
| Nitrogen input (kg ha <sup>-1</sup> year <sup>-1</sup> )              | 550      | ✓    |      |
| Soil organic matter balance (kg ha <sup>-1</sup> year <sup>-1</sup> ) | 18050    |      | ✓    |
| Protein yield (persons ha <sup>-1</sup> year <sup>-1</sup> )          | 23       |      | ✓    |
| <b>Decision Variables</b>                                             |          |      |      |
| Bush bean monocrop area (ha)                                          | 0        | 0    | 1    |
| Banana monocrop with 4 leaves area (ha)                               | 0        | 0    | 1    |
| Banana monocrop with 7 leaves area (ha)                               | 0        | 0    | 1    |
| Banana monocrop with all leaves (un-pruned) area (ha)                 | 0        | 0    | 1    |
| Banana-bush bean intercrop with 4 leaves area (ha)                    | 1        | 0    | 1    |
| Banana-bush bean intercrop with 7 leaves area (ha)                    | 0        | 0    | 1    |
| Banana-bush bean intercrop with all leaves area (ha)                  | 0        | 0    | 1    |
| Calliandra hedge area (ha)                                            | 0        | 0    | 0.1  |
| Tithonia hedge area (ha)                                              | 0        | 0    | 0.1  |
| NPK (17:17:17) (kg)                                                   | 588      | 0    | 700  |
| CAN (26% N) (kg)                                                      | 385      | 0    | 400  |
| DAP (kg)                                                              | 65       | 0    | 70   |
| MOP (kg)                                                              | 407      | 0    | 500  |
| Urea (kg)                                                             | 217      | 0    | 300  |
| Goat manure added (kg)                                                | 7353     | 0    | 8000 |
| <b>Constraints</b>                                                    |          |      |      |
| Total farm area (ha)                                                  | 1        | 0.95 | 1    |
| N balance (kg ha <sup>-1</sup> year <sup>-1</sup> )                   | 456      | 0    | 9999 |
| P balance (kg ha <sup>-1</sup> year <sup>-1</sup> )                   | 240      | 0    | 9999 |
| K balance (kg ha <sup>-1</sup> year <sup>-1</sup> )                   | 220      | 0    | 9999 |
